# Supplementary material for: Flucard Pro SDカードLinuxマシンでフォトフレームをネット対応に (特集 基本から変わり種まで目的別6タイプ! 簡単&格安で作る 最強のLinuxマシン)
Source: eLife journal article supplement (doi:10.7554/elife.73347), 2012-09-01
Supplement: supp [file elife-73347-supp-v1.zip]

Archive with 18 entries (18 files):
- elife_poa_e73347_Figure_1_figure_supplement_1.tif
- elife_poa_e73347_Figure_2_figure_supplement_1.tif
- elife_poa_e73347_Figure_3_figure_supplement_1.tif
- elife_poa_e73347_Figure_3_figure_supplement_2.tif
- elife_poa_e73347_Figure_4_figure_supplement_1.tif
- elife_poa_e73347_Figure_5_figure_supplement_1.tif
- elife_poa_e73347_Figure_7_figure_supplement_1.tif
- elife_poa_e73347_Supplementary_file_1.docx
- elife_poa_e73347_Supplementary_file_2.docx
- elife_poa_e73347_Supplementary_file_3.docx
- elife_poa_e73347_Figure_1_source_data_1.xlsx
- elife_poa_e73347_Figure_4_source_data_1.xlsx
- elife_poa_e73347_Figure_4_source_data_1.xlsx
- elife_poa_e73347_Figure_5_source_data_1.xlsx
- elife_poa_e73347_Figure_5_source_data_1.xlsx
- elife_poa_e73347_Figure_6_source_data_1.xlsx
- elife_poa_e73347_Source_data_1.zip
- elife_poa_e73347_Transparent_Reporting_File.pdf
