# Supplementary material for: Flucard Pro SDカードLinuxマシンでフォトフレームをネット対応に (特集 基本から変わり種まで目的別6タイプ! 簡単&格安で作る 最強のLinuxマシン)
Source: eLife journal article supplement (doi:10.7554/elife.73347), 2012-09-01
Supplement: supp [file elife-73347-supp-v1.zip › elife_poa_e73347_Figure_1_source_data_1.xlsx]

## Sheet: Figure 1A
Numerical data for Figure 1A
Sample	0 h				0.5 h				1 h
	replicate 1	replicate 2	replicate 3	Mean	replicate 1	replicate 2	replicate 3	Mean	replicate 1	replicate 2	replicate 3	Mean
Starve	1.1	1.05	0.86	1.00333	3.46	2.64	2.23	2.77667	6.76	6.37	5.16	6.09667
H2O2	1.1	1.05	0.86	1.00333	1.69	1.65	1.45	1.59667	2.87	2.48	2.83	2.72667
MMS	1.1	1.05	0.86	1.00333	1.46	1.54	1.19	1.39667	2.14	1.68	1.93	1.91667
CIP	1.1	1.05	0.86	1.00333	3.73	3.14	2.91	3.26	4.26	3.89	4.63	4.26
