# Supplementary material for: Flucard Pro SDカードLinuxマシンでフォトフレームをネット対応に (特集 基本から変わり種まで目的別6タイプ! 簡単&格安で作る 最強のLinuxマシン)
Source: eLife journal article supplement (doi:10.7554/elife.73347), 2012-09-01
Supplement: supp [file elife-73347-supp-v1.zip › elife_poa_e73347_Figure_4_source_data_1.xlsx]

## Sheet: Figure 4E
Numerical data for Figure 4E
Time (h)	mc2155 + 2% glyycerol				mc2155 + 0.2% glyycerol				mc2155 + 0.02% glyycerol				ΔsigF + 2% glyycerol				ΔsigF + 0.2% glyycerol				ΔsigF + 0.02% glyycerol
	replicate 1	replicate 2	replicate 3	Mean	replicate 1	replicate 2	replicate 3	Mean	replicate 1	replicate 2	replicate 3	Mean	replicate 1	replicate 2	replicate 3	Mean	replicate 1	replicate 2	replicate 3	Mean	replicate 1	replicate 2	replicate 3	Mean
27	32.85	32.5	32.82	32.7233	28.49	29.03	29.51	29.01	23.49	25.23	24.37	24.3633	5.92	5.9	5.88	5.9	8.32	8.08	8.2	8.2	8.42	8.28	8.5	8.4
30	32.19	32.09	31.99	32.09	36.3	36.94	37.55	36.93	54.8	59.99	57.89	57.56	6.55	6.65	6.8	6.66667	8.6	9.55	9.1	9.08333	9	9.3	9.35	9.21667
33	40.35	41.99	39.58	40.64	37.01	34.7	39.4	37.0367	60.2	70.01	66.66	65.6233	8.6	8.4	8.65	8.55	9.95	10	10.35	10.1	10.5	10.3	10.7	10.5
36	59.8	62.62	66.79	63.07	69.1	61.15	65.02	65.09	114.73	137.1	118.02	123.283	8.6	8.95	8.4	8.65	11.2	11.45	11.3	11.3167	10.5	10	11	12.0167
39	75.33	79.15	85.53	80.0033	70.25	81.75	76.5	76.1667	175.91	167.95	161.56	168.473	9.4	9.55	9.65	9.53333	16.8	16.55	17.05	16.8	12.05	11.75	12.25	14.6167
42	63.58	66.6	69.62	66.6	104.3	110.9	115.2	110.133	168.77	162.13	156.12	162.34	12.3	12.55	12.8	12.55	16.65	17.3	17.65	17.2	14.45	14.75	14.65	15.8167
45	59.58	54.6	64.62	59.6	88.39	84.25	80.05	84.23	177.9	171.6	183.75	177.75	12.9	12.4	11.95	12.4167	18.85	18.4	18.45	18.5667	14.1	14.6	14.4	15.4167
48	26.75	32.8	38.85	32.8	82.03	94.95	88.3	88.4267	154.55	173.85	163.99	164.13	11.05	11.25	11.6	11.3	20.99	20.71	20.6	20.7667	15.35	15.6	15.3	16.35
60	22.35	30.4	25.3	26.0167	84.95	91.54	90.6	89.03	172.8	158.95	148.05	159.933	9.4	9.6	9.35	9.45	16.55	16.35	17.05	16.65	16.1	16.65	16.3	14.8833
