# Supplementary material for: Flucard Pro SDカードLinuxマシンでフォトフレームをネット対応に (特集 基本から変わり種まで目的別6タイプ! 簡単&格安で作る 最強のLinuxマシン)
Source: eLife journal article supplement (doi:10.7554/elife.73347), 2012-09-01
Supplement: supp [file elife-73347-supp-v1.zip › elife_poa_e73347_Figure_4_source_data_1.xlsx]

## Sheet: Figure 4A
Numerical data for Figure 4A
Sample	replicate 1	replicate 2	replicate 3	Mean
mc2155_MEP	1	0.91	1.09	1
ΔsigF_MEP	0.76	0.87	0.99	0.873333
mc2155_MSP	9.48	9.09	9.3	9.29
ΔsigF_MSP	0.028	0.035	0.043	0.0353333
