# Supplementary material for: Flucard Pro SDカードLinuxマシンでフォトフレームをネット対応に (特集 基本から変わり種まで目的別6タイプ! 簡単&格安で作る 最強のLinuxマシン)
Source: eLife journal article supplement (doi:10.7554/elife.73347), 2012-09-01
Supplement: supp [file elife-73347-supp-v1.zip › elife_poa_e73347_Figure_5_source_data_1.xlsx]

## Sheet: Figure 5B
Numerical data for Figure 5B
Sample	replicate 1	replicate 2	replicate 3	Mean	p-value ( t-test)	Significance
PUCP	19.13	20.65	24.5	21.4267	N/A	N/A
PUCPmut	81.61	82.05	83.42	82.36	0.000298981	***
