# Supplementary material for: Flucard Pro SDカードLinuxマシンでフォトフレームをネット対応に (特集 基本から変わり種まで目的別6タイプ! 簡単&格安で作る 最強のLinuxマシン)
Source: eLife journal article supplement (doi:10.7554/elife.73347), 2012-09-01
Supplement: supp [file elife-73347-supp-v1.zip › elife_poa_e73347_Figure_5_source_data_1.xlsx]

## Sheet: Figure 5C
Numerical data for Figure 5C
Sample	replicate 1	replicate 2	replicate 3	Mean	p-value ( t-test)	Significance
control	1.08	0.85	1.13	1.02	N/A	N/A
ascarDOE	0.312	0.32	0.26	0.297333	0.00944059	**
control	0.97	0.94	0.8	0.903333	0.437601	n.s.
ascarDKD	2.28	2.48	1.97	2.24333	0.00320826	**
