# Supplementary material for: Flucard Pro SDカードLinuxマシンでフォトフレームをネット対応に (特集 基本から変わり種まで目的別6タイプ! 簡単&格安で作る 最強のLinuxマシン)
Source: eLife journal article supplement (doi:10.7554/elife.73347), 2012-09-01
Supplement: supp [file elife-73347-supp-v1.zip › elife_poa_e73347_Figure_6_source_data_1.xlsx]

## Sheet: Sheet1
Numerical data for Figure 6B
Bacterial survival in stationary phase
Time (d)	mc2155							AsM							AAAS_del							AsM/AAAS_del
	replicate 1	replicate 2	replicate 3	replicate 4	Mean	p-value ( t-test)	Significance	replicate 1	replicate 2	replicate 3	replicate 4	Mean	p-value ( t-test)	Significance	replicate 1	replicate 2	replicate 3	replicate 4	Mean	p-value ( t-test)	Significance	replicate 1	replicate 2	replicate 3	replicate 4	Mean	p-value ( t-test)	Significance
0	5700000000	6700000000	4900000000	6200000000	5875000000	N/A	N/A	6300000000	6500000000	5400000000	6000000000	6050000000	0.479846	n.s.	6700000000	5900000000	4900000000	5600000000	5775000000	0.820539	n.s.	4800000000	5600000000	6100000000	5700000000	5550000000	0.578629	n.s.
15	3400000000	4200000000	4500000000	3000000000	3775000000	N/A	N/A	3600000000	4100000000	3800000000	2800000000	3575000000	0.363426	n.s.	2500000000	1900000000	3200000000	2800000000	2600000000	0.0750793	n.s.	3100000000	2300000000	2600000000	1900000000	2475000000	0.042633	*
Bacterial survival in acidic medium (pH 4.5)
Time (d)	mc2155							AsM							AAAS_del							AsM/AAAS_del
	replicate 1	replicate 2	replicate 3	replicate 4	Mean	p-value ( t-test)	Significance	replicate 1	replicate 2	replicate 3	replicate 4	Mean	p-value ( t-test)	Significance	replicate 1	replicate 2	replicate 3	replicate 4	Mean	p-value ( t-test)	Significance	replicate 1	replicate 2	replicate 3	replicate 4	Mean	p-value ( t-test)	Significance
0	900000	920000	880000	1050000	937500	N/A	N/A	850000	930000	1130000	860000	942500	0.959983	n.s.	850000	1120000	1050000	1010000	1007500	0.371098	n.s.	730000	1210000	870000	1030000	960000	0.830438	n.s.
15	470000	470000	400000	380000	430000	N/A	N/A	350000	370000	290000	370000	345000	0.0438777	*	340000	290000	360000	260000	312500	0.0270209	*	210000	310000	150000	230000	225000	0.00582721	**
Bacterial survival in neutral PBS (pH 7.0)
Time (d)	mc2155							AsM							AAAS_del							AsM/AAAS_del
	replicate 1	replicate 2	replicate 3	replicate 4	Mean	p-value ( t-test)	Significance	replicate 1	replicate 2	replicate 3	replicate 4	Mean	p-value ( t-test)	Significance	replicate 1	replicate 2	replicate 3	replicate 4	Mean	p-value ( t-test)	Significance	replicate 1	replicate 2	replicate 3	replicate 4	Mean	p-value ( t-test)	Significance
0	900000	920000	880000	1050000	937500	N/A	N/A	850000	930000	1130000	860000	942500	0.959983	n.s.	850000	1120000	1050000	1010000	1007500	0.371098	n.s.	730000	1210000	870000	1030000	960000	0.830438	n.s.
15	650000	660000	700000	530000	635000	N/A	N/A	600000	480000	620000	570000	567500	0.233348	n.s.	410000	440000	540000	500000	472500	0.0414242	*	330000	380000	240000	120000	267500	0.00295221	**
Bacterial survival in neutral PBS (pH 4.5)
Time (d)	mc2155							AsM							AAAS_del							AsM/AAAS_del
	replicate 1	replicate 2	replicate 3	replicate 4	Mean	p-value ( t-test)	Significance	replicate 1	replicate 2	replicate 3	replicate 4	Mean	p-value ( t-test)	Significance	replicate 1	replicate 2	replicate 3	replicate 4	Mean	p-value ( t-test)	Significance	replicate 1	replicate 2	replicate 3	replicate 4	Mean	p-value ( t-test)	Significance
0	900000	920000	880000	1050000	937500	N/A	N/A	850000	930000	1130000	860000	942500	0.959983	n.s.	850000	1120000	1050000	1010000	1007500	0.371098	n.s.	730000	1210000	870000	1030000	960000	0.830438	n.s.
15	52000	48000	50000	42000	48000	N/A	N/A	43000	48000	43000	39000	43250	0.0997014	n.s.	30000	23000	40000	37000	32500	0.0475009	*	18000	13000	10000	21000	15500	0.00404545	**
