# Supplementary figures and images for: Flucard Pro SDカードLinuxマシンでフォトフレームをネット対応に (特集 基本から変わり種まで目的別6タイプ! 簡単&格安で作る 最強のLinuxマシン)
Source: eLife journal article supplement (doi:10.7554/elife.73347), 2012-09-01

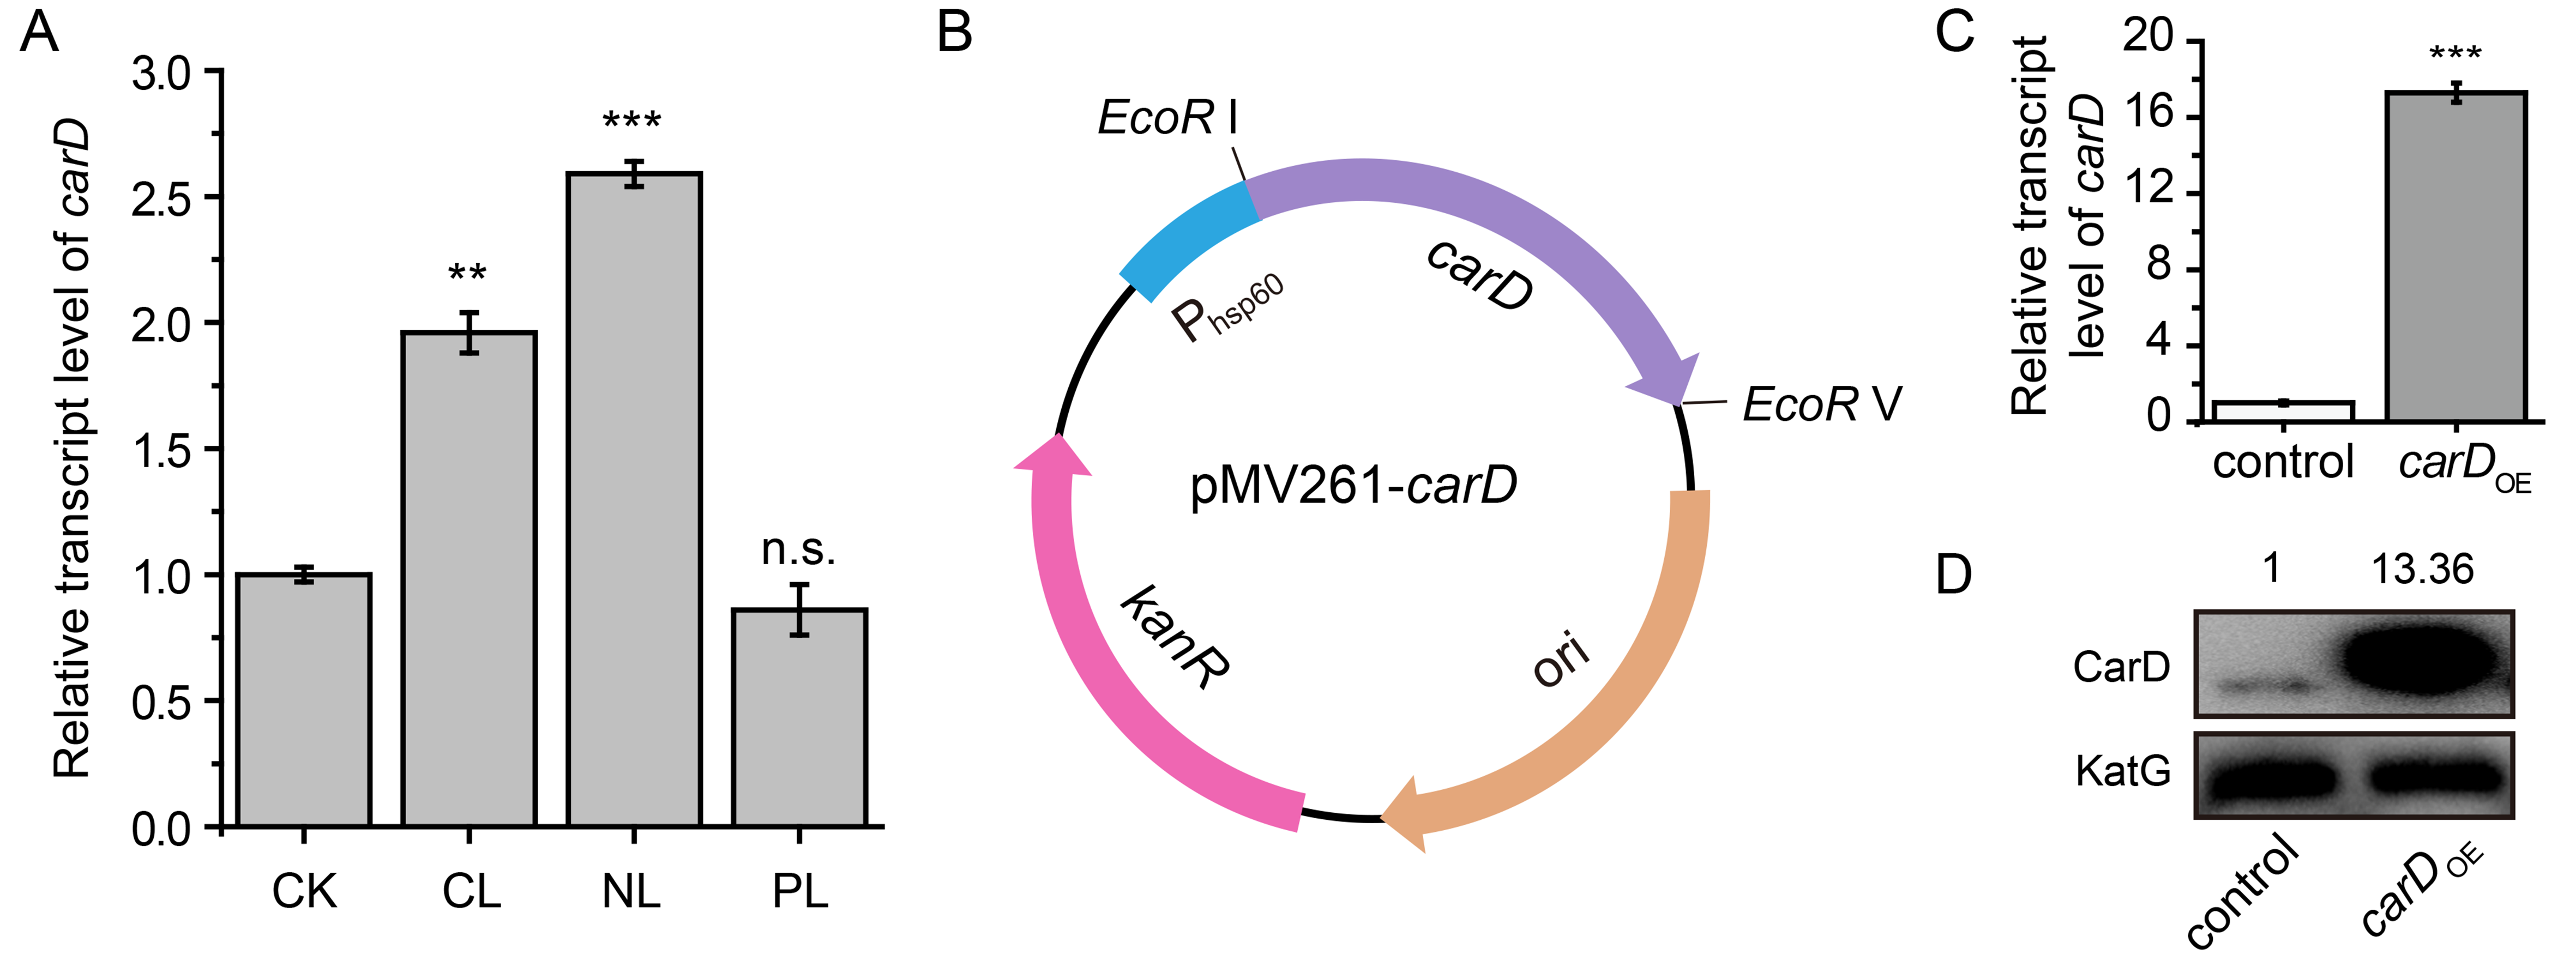

Supplement: supp [file elife-73347-supp-v1.zip › elife_poa_e73347_Figure_1_figure_supplement_1.tif]

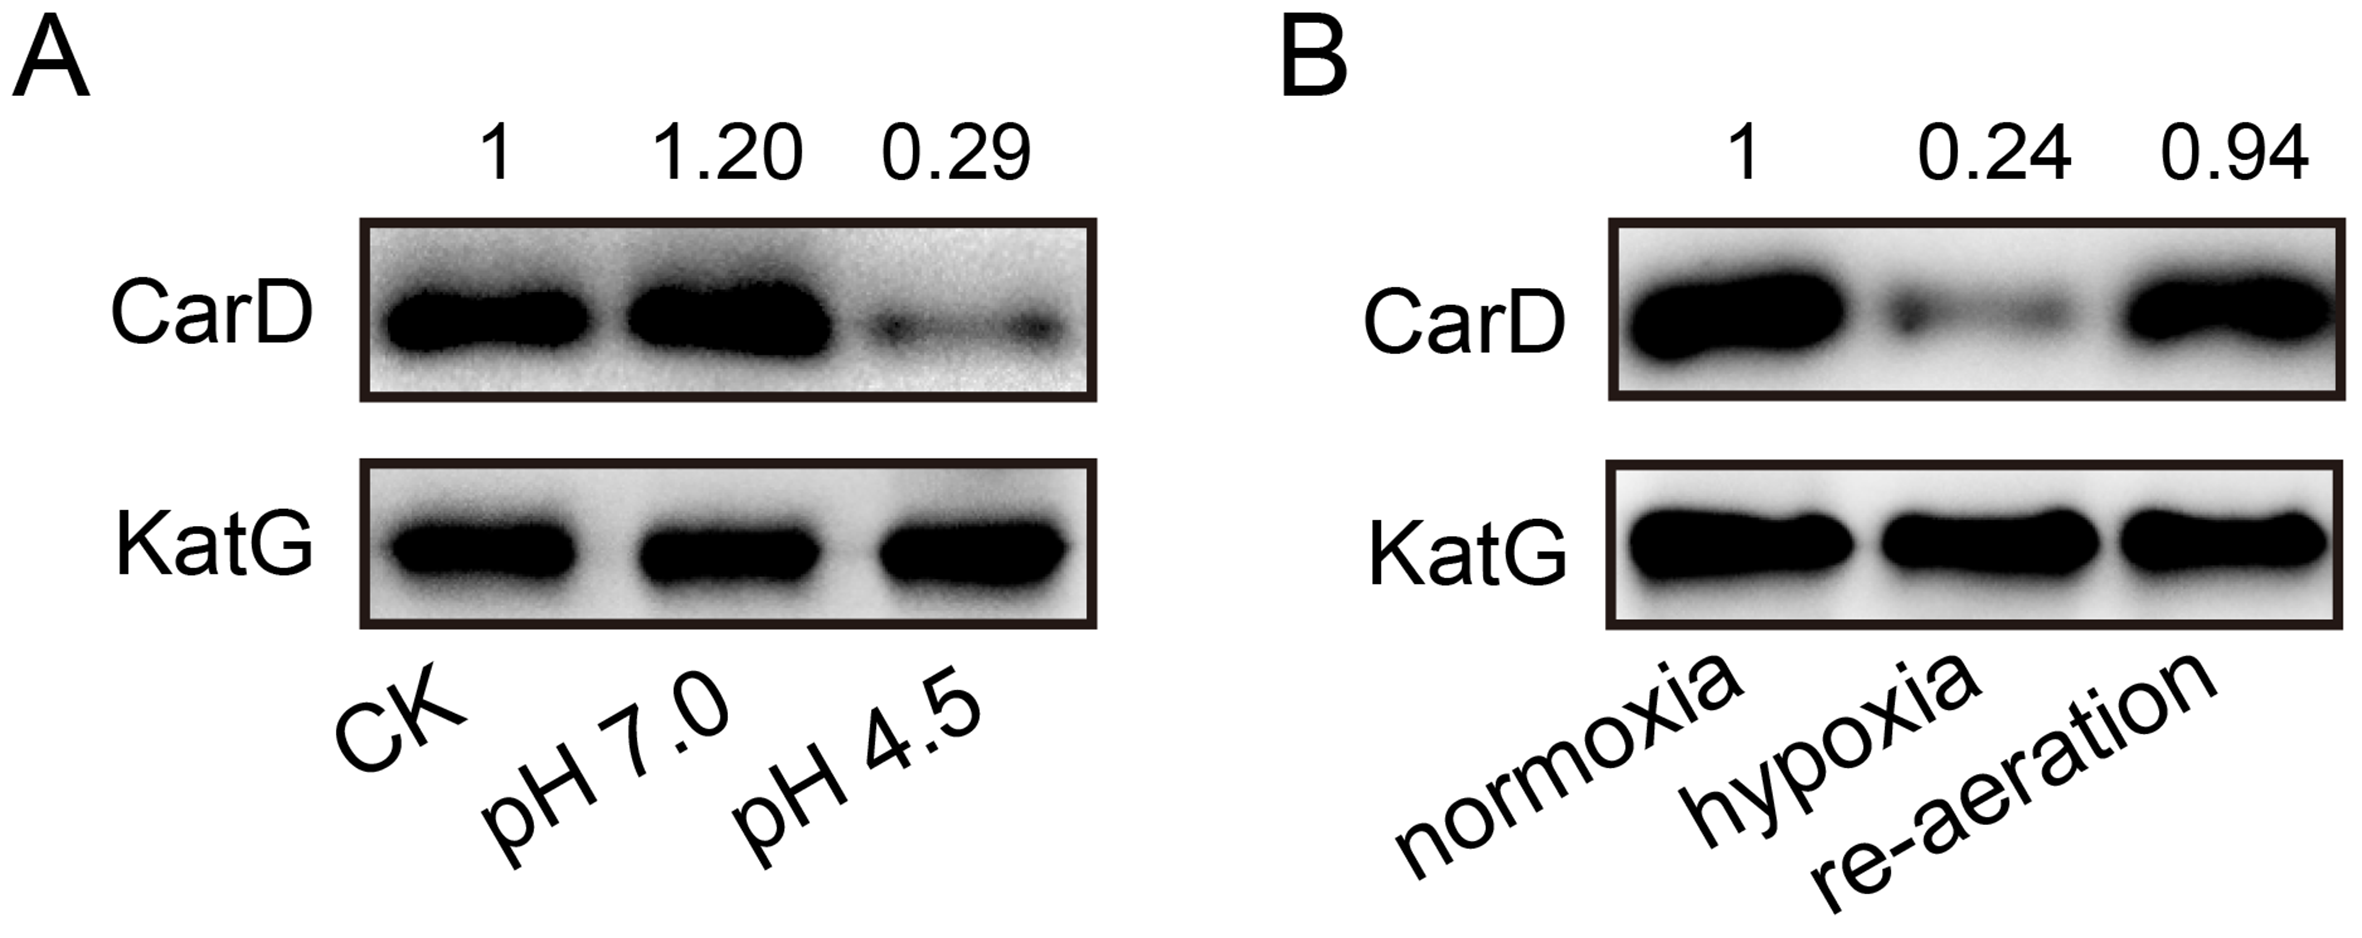

Supplement: supp [file elife-73347-supp-v1.zip › elife_poa_e73347_Figure_2_figure_supplement_1.tif]

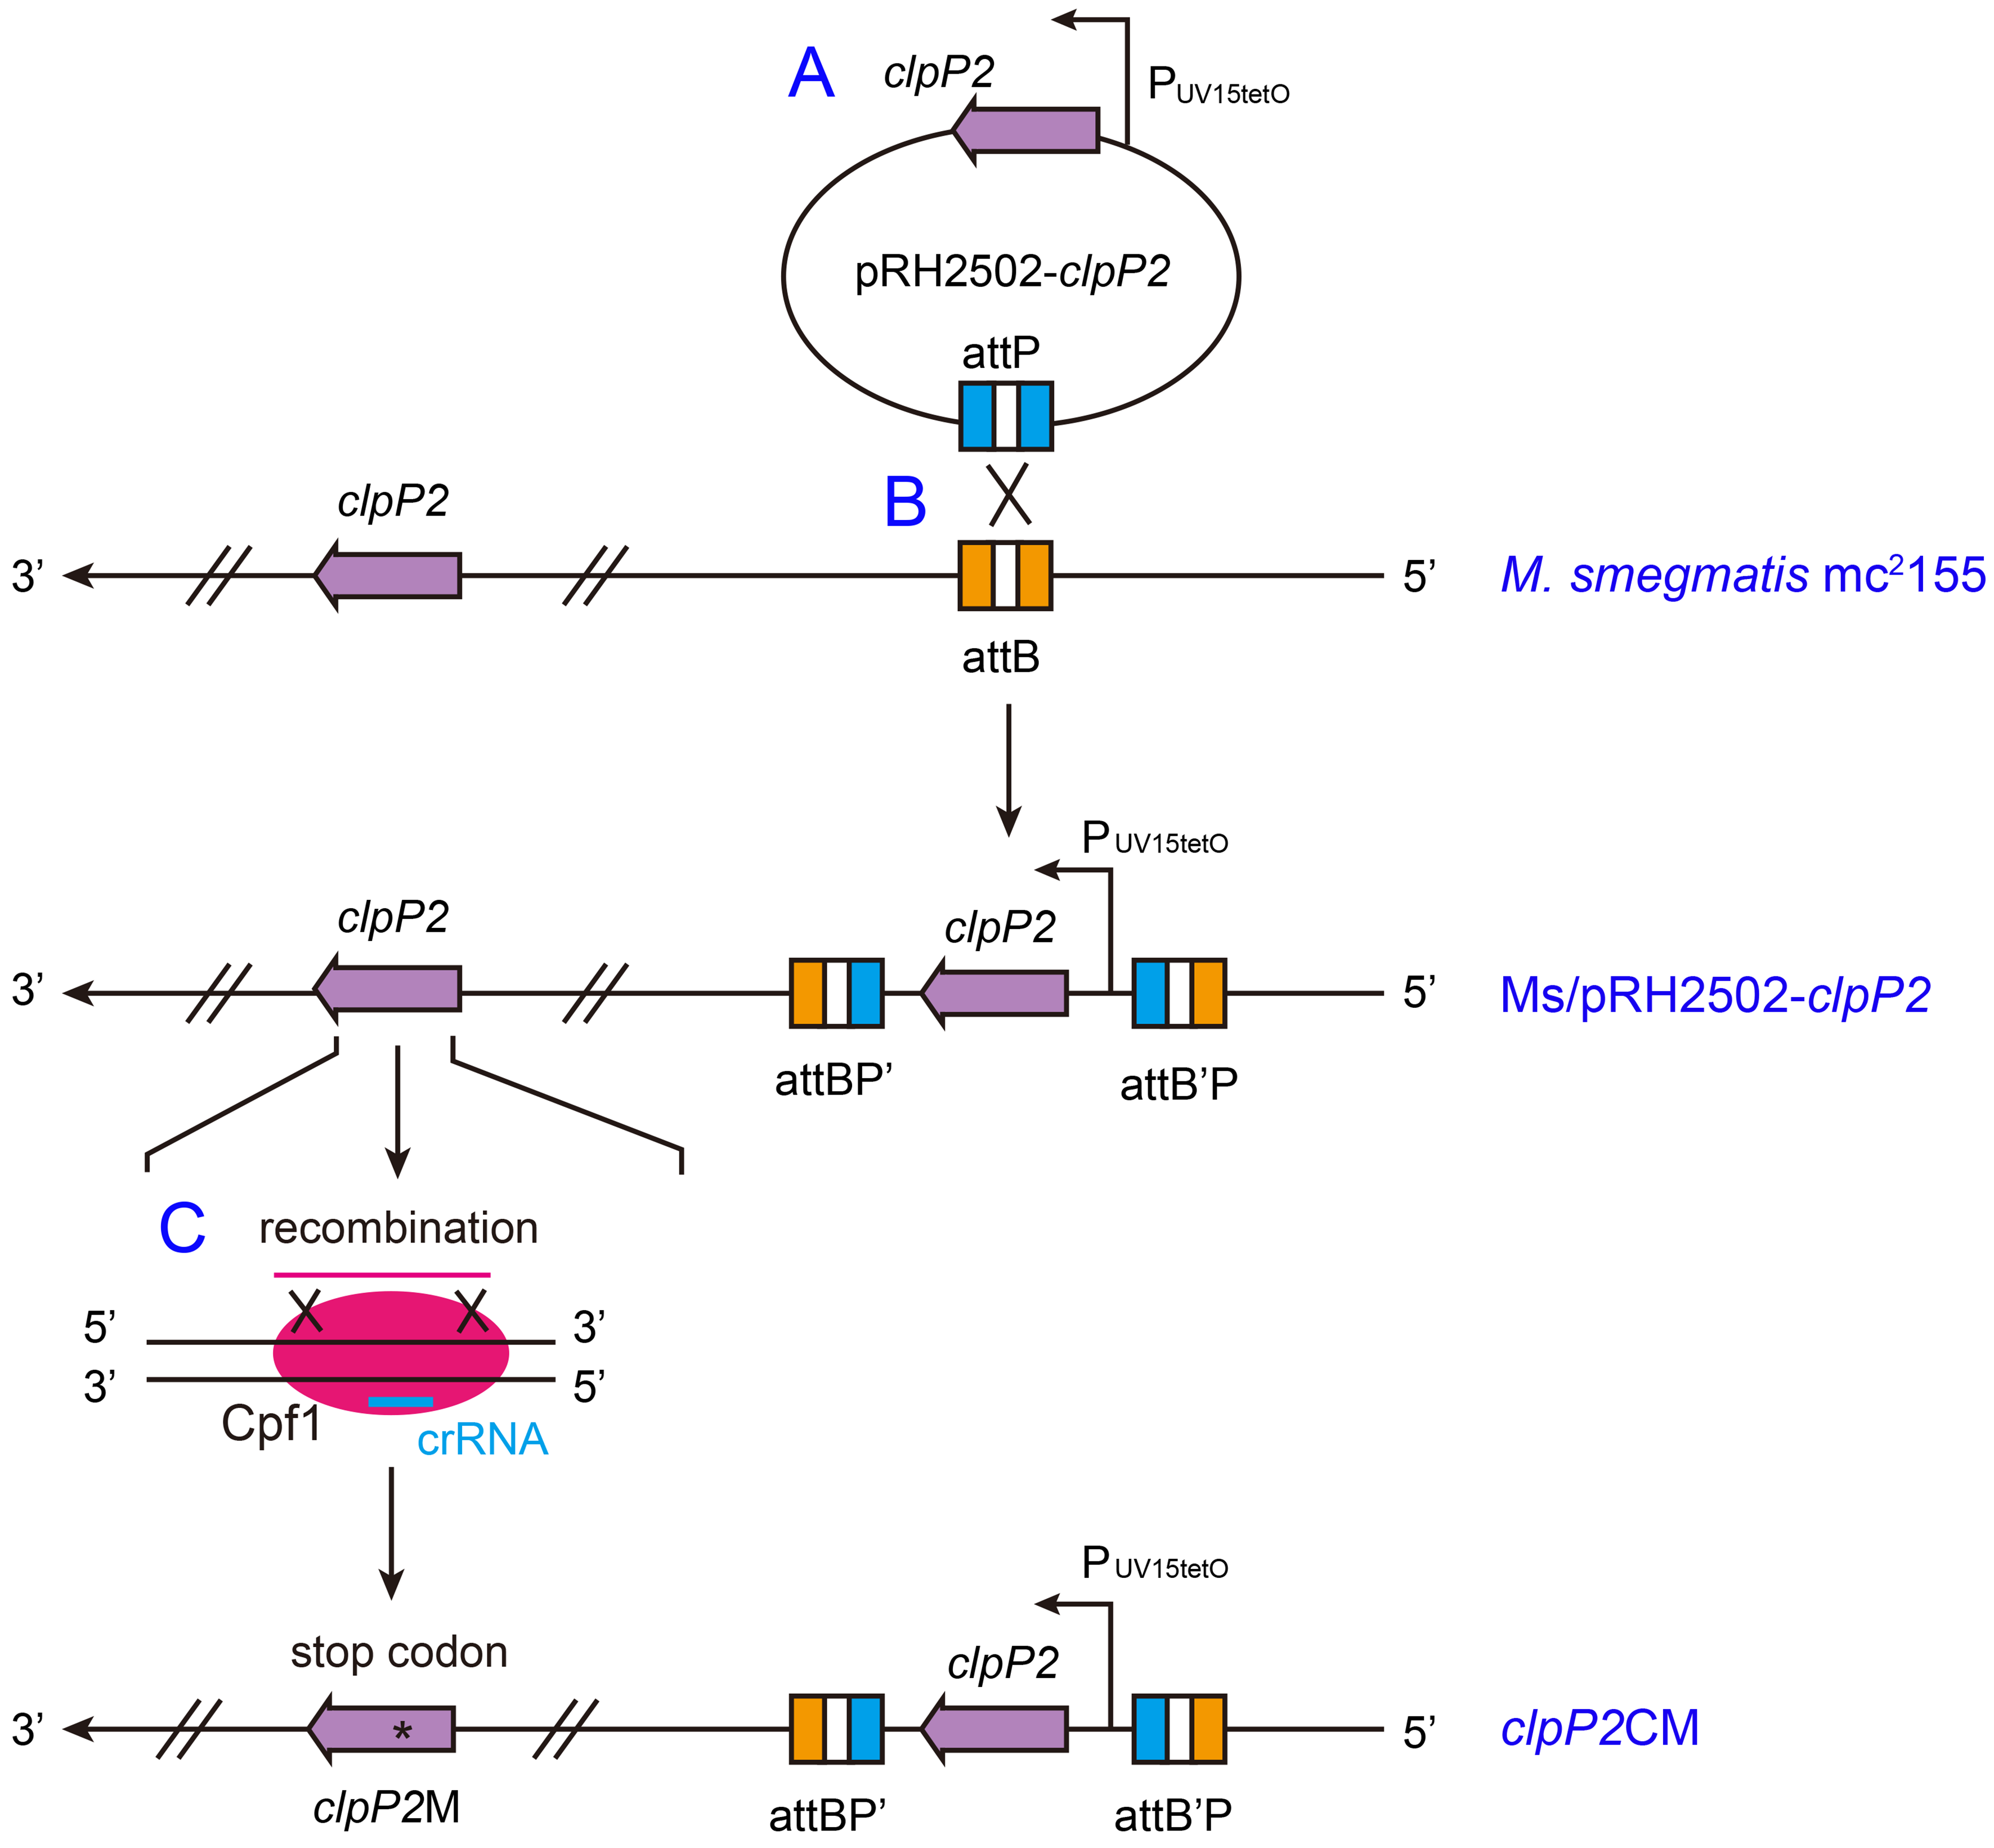

Supplement: supp [file elife-73347-supp-v1.zip › elife_poa_e73347_Figure_3_figure_supplement_1.tif]

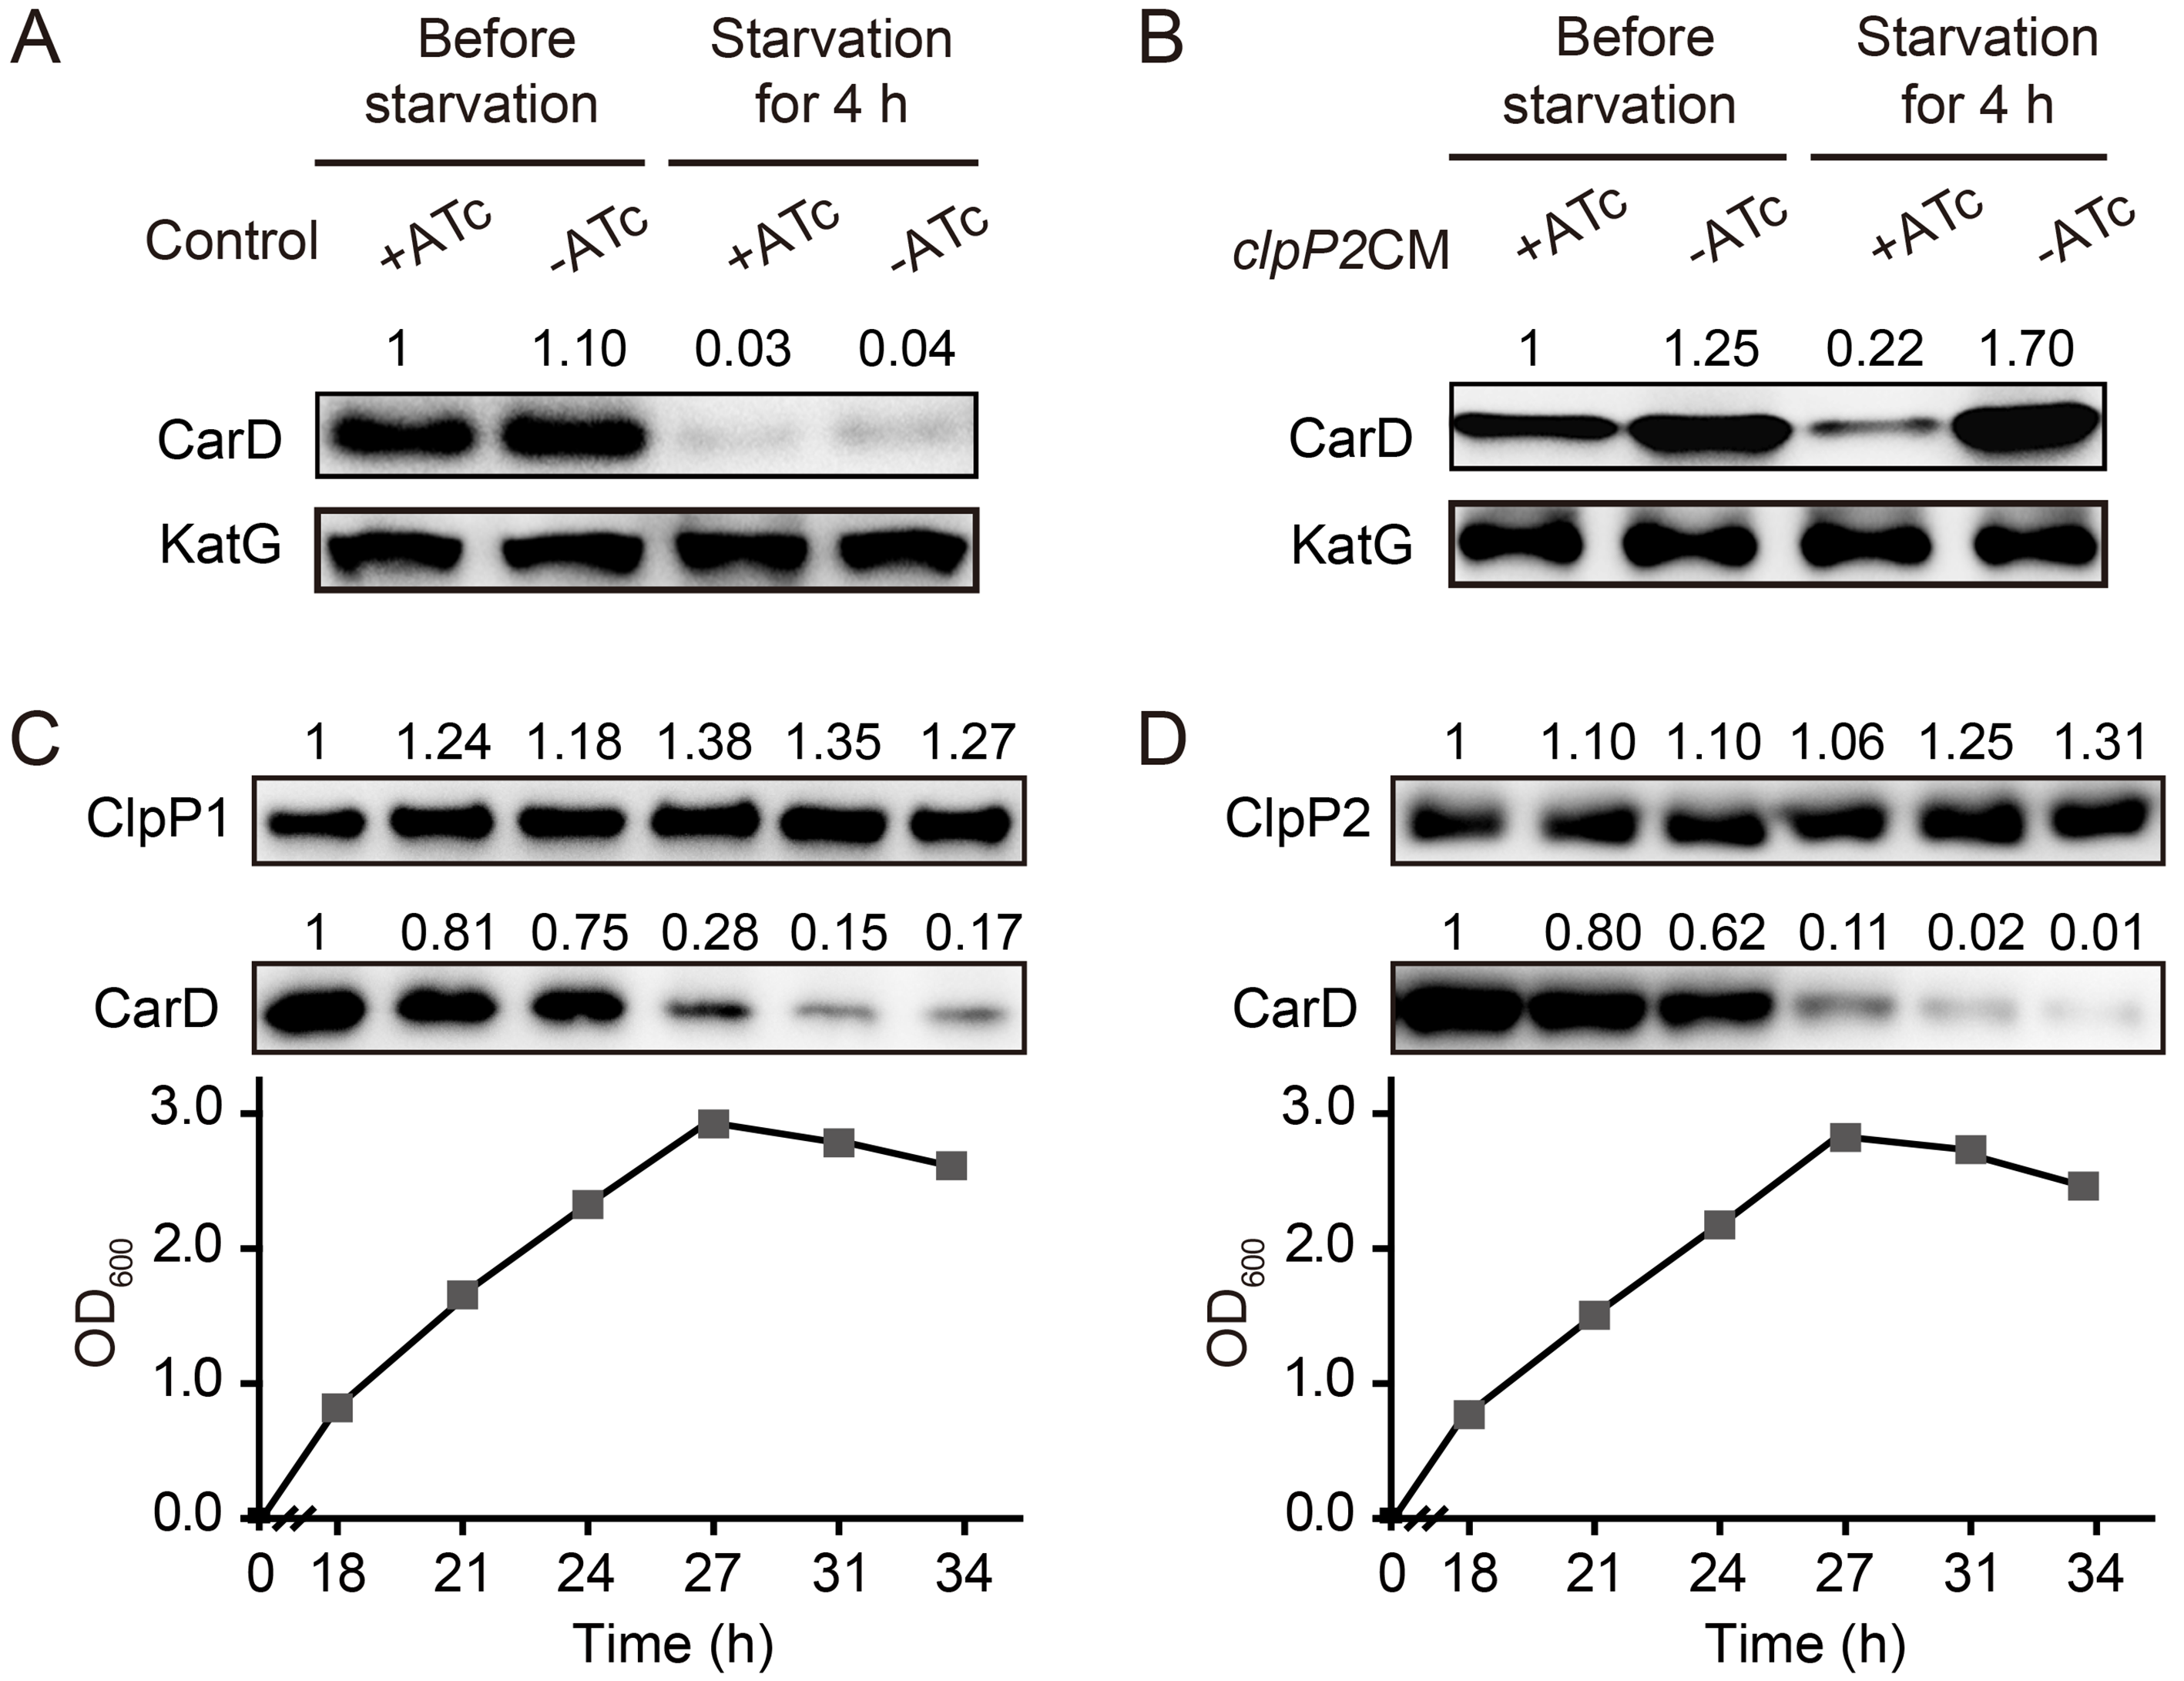

Supplement: supp [file elife-73347-supp-v1.zip › elife_poa_e73347_Figure_3_figure_supplement_2.tif]

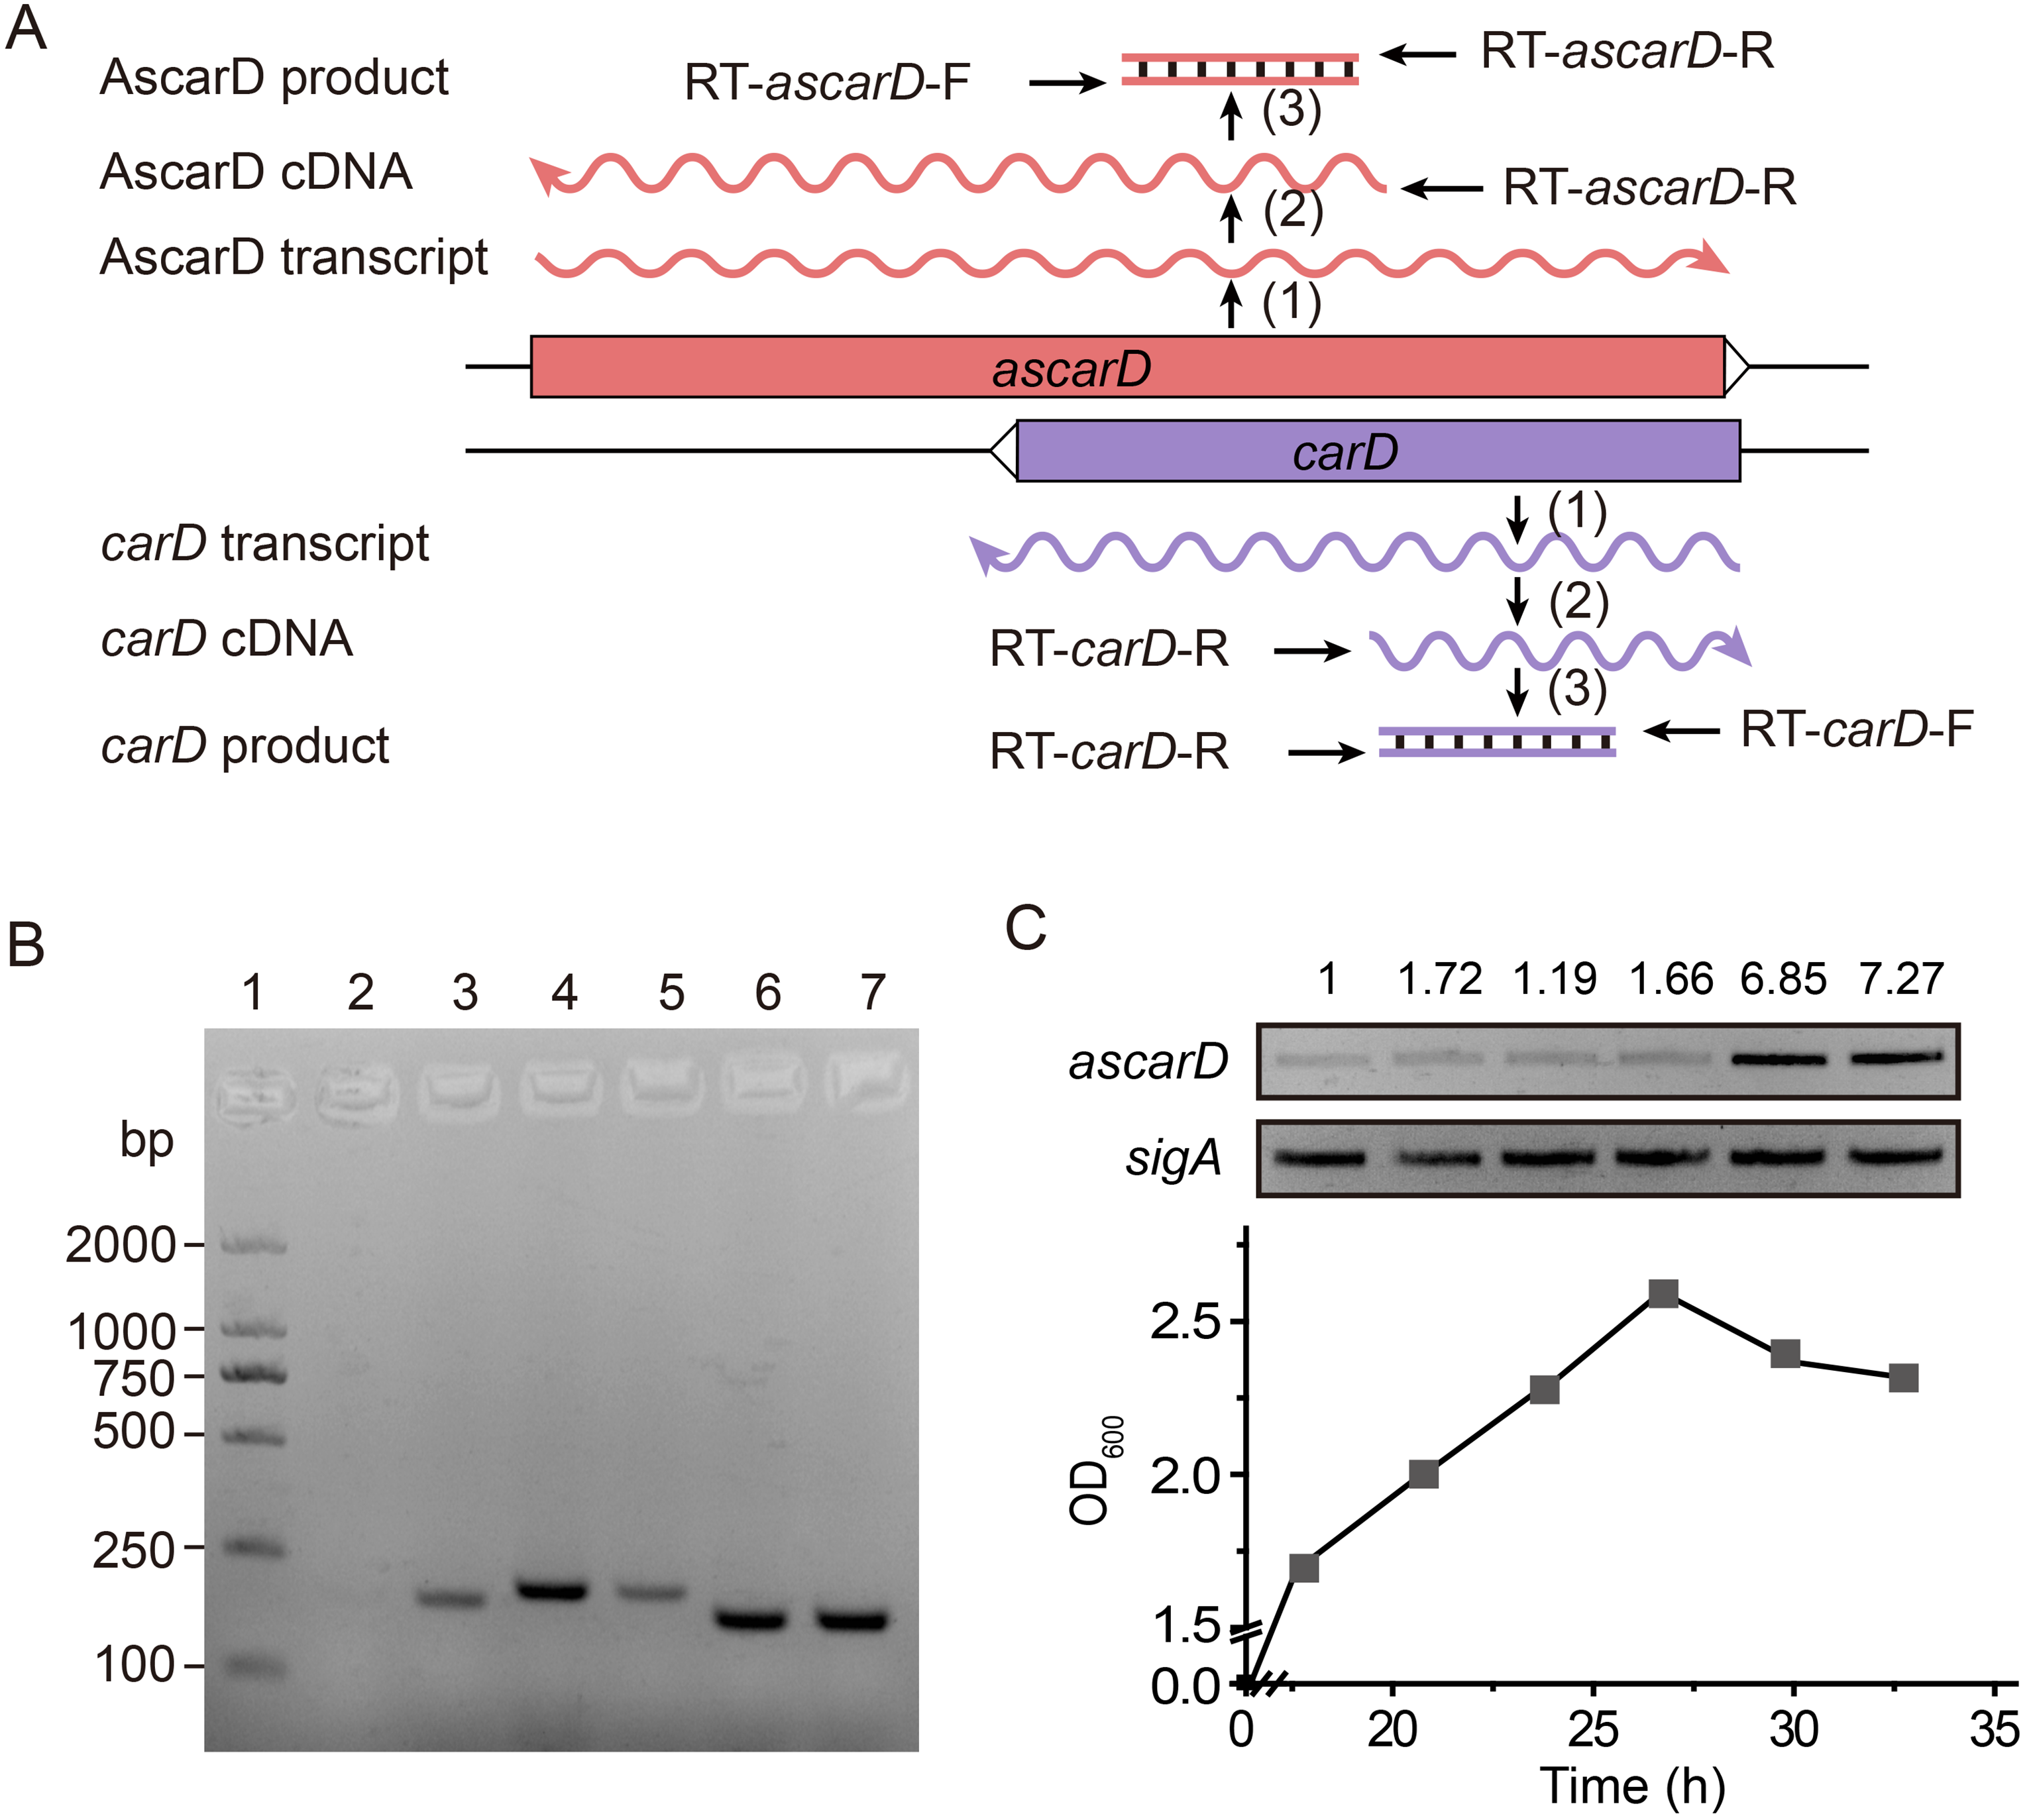

Supplement: supp [file elife-73347-supp-v1.zip › elife_poa_e73347_Figure_4_figure_supplement_1.tif]

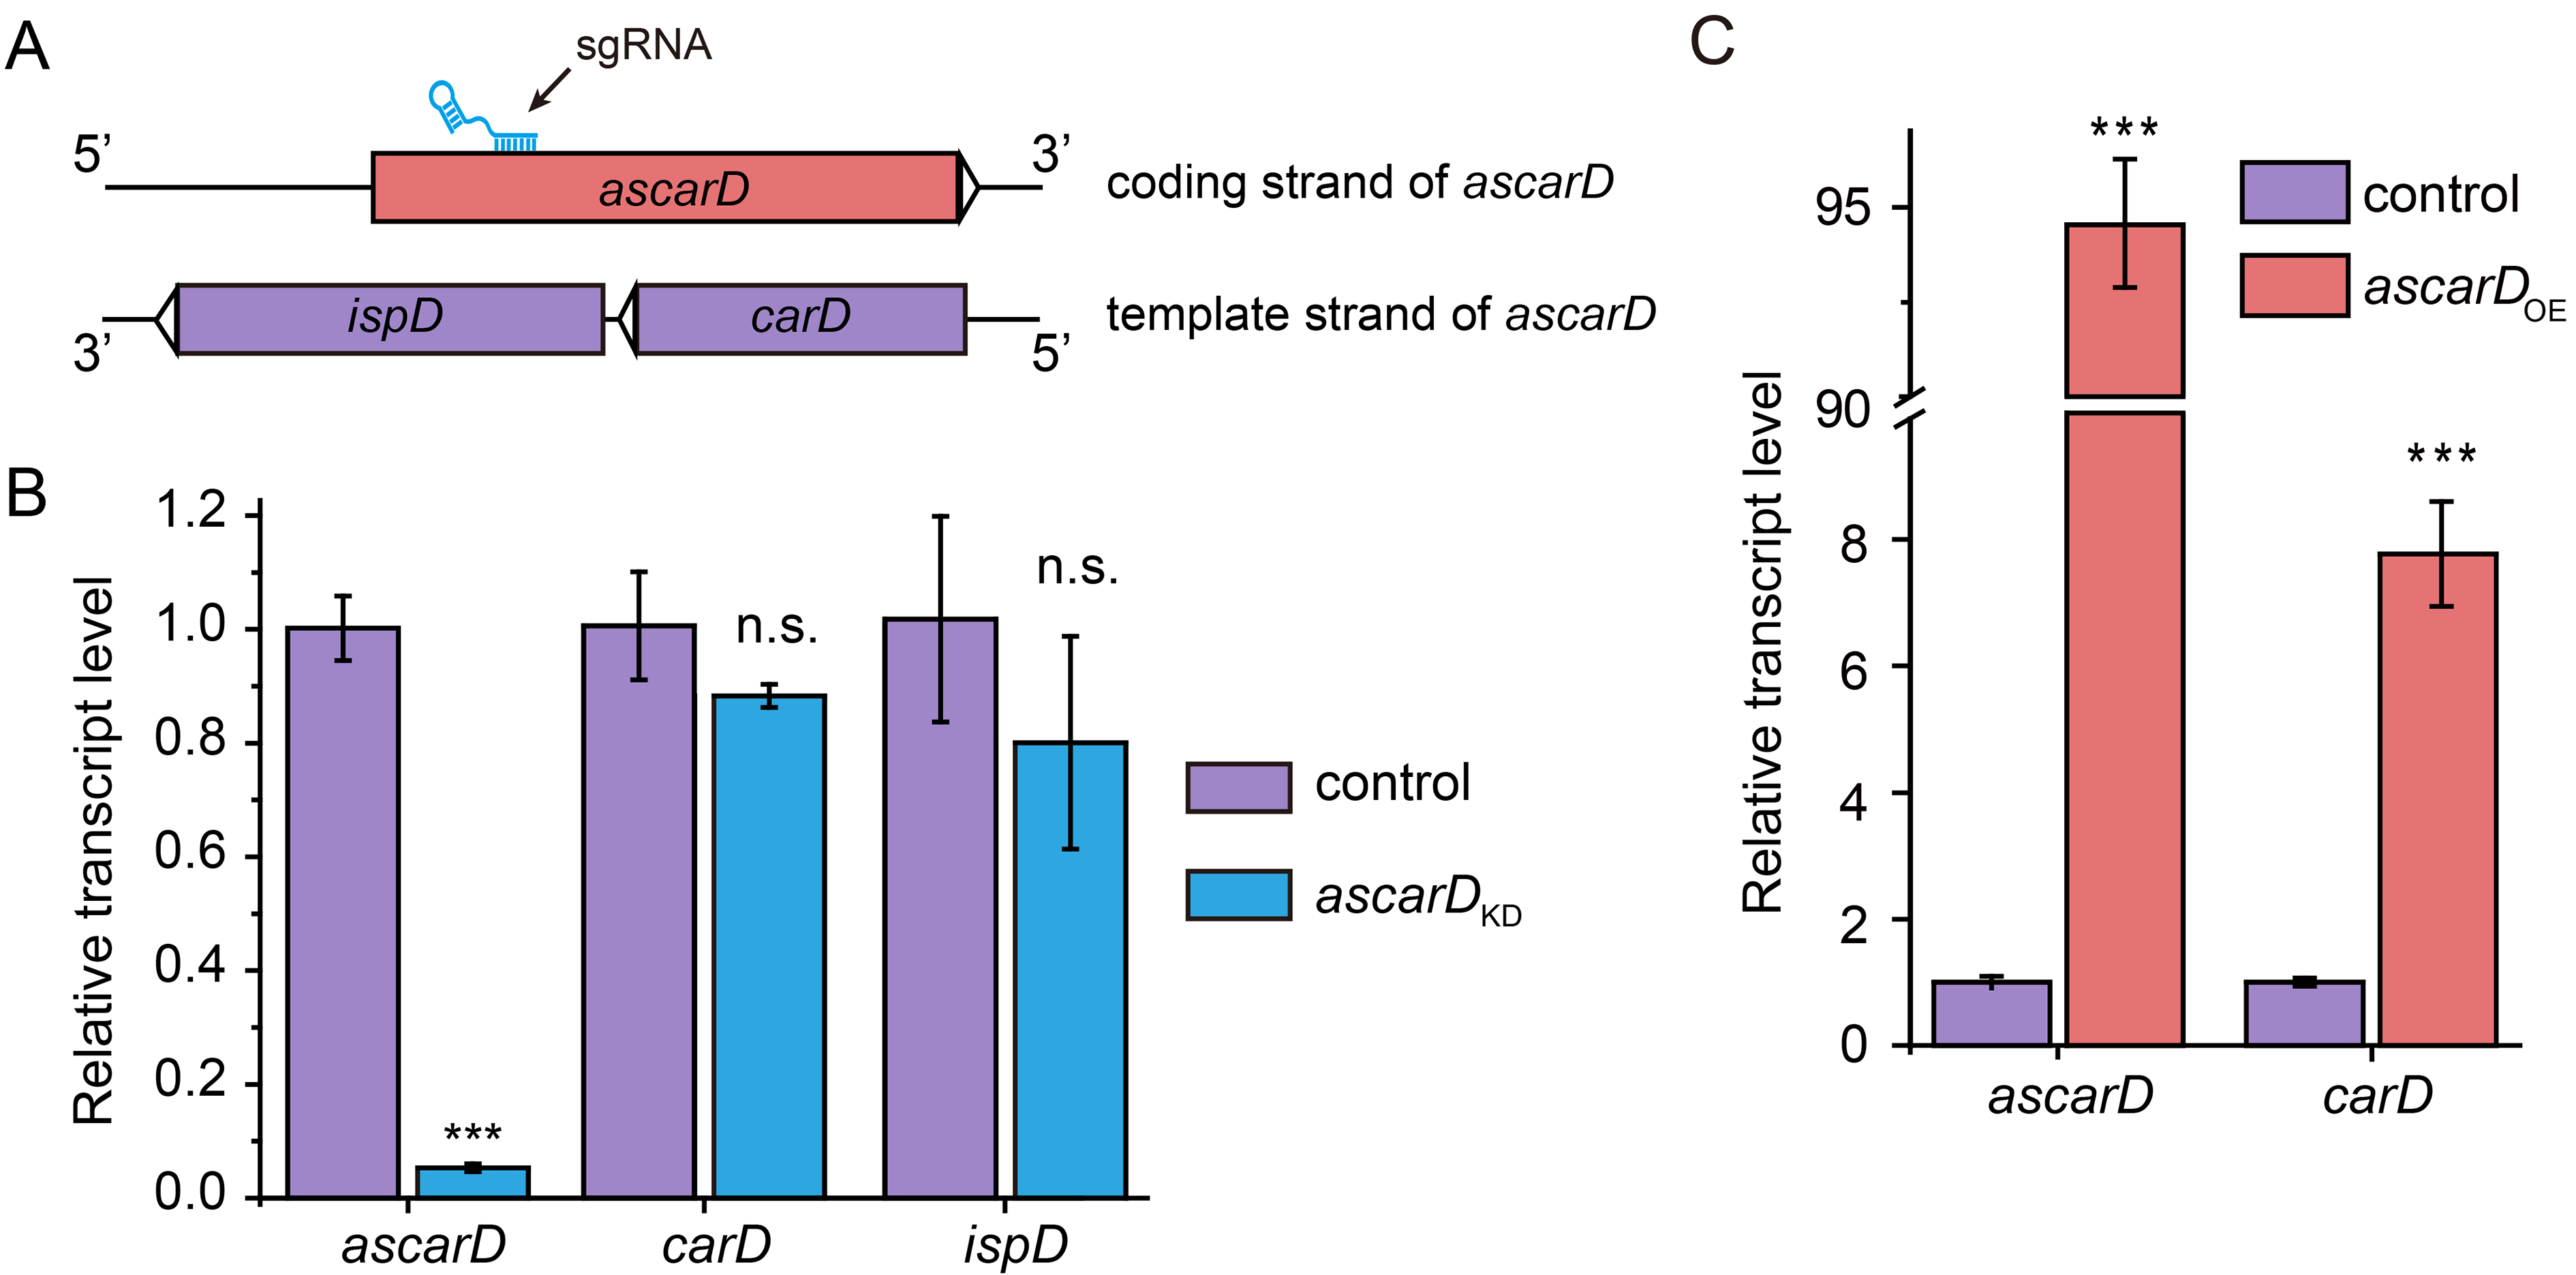

Supplement: supp [file elife-73347-supp-v1.zip › elife_poa_e73347_Figure_5_figure_supplement_1.tif]

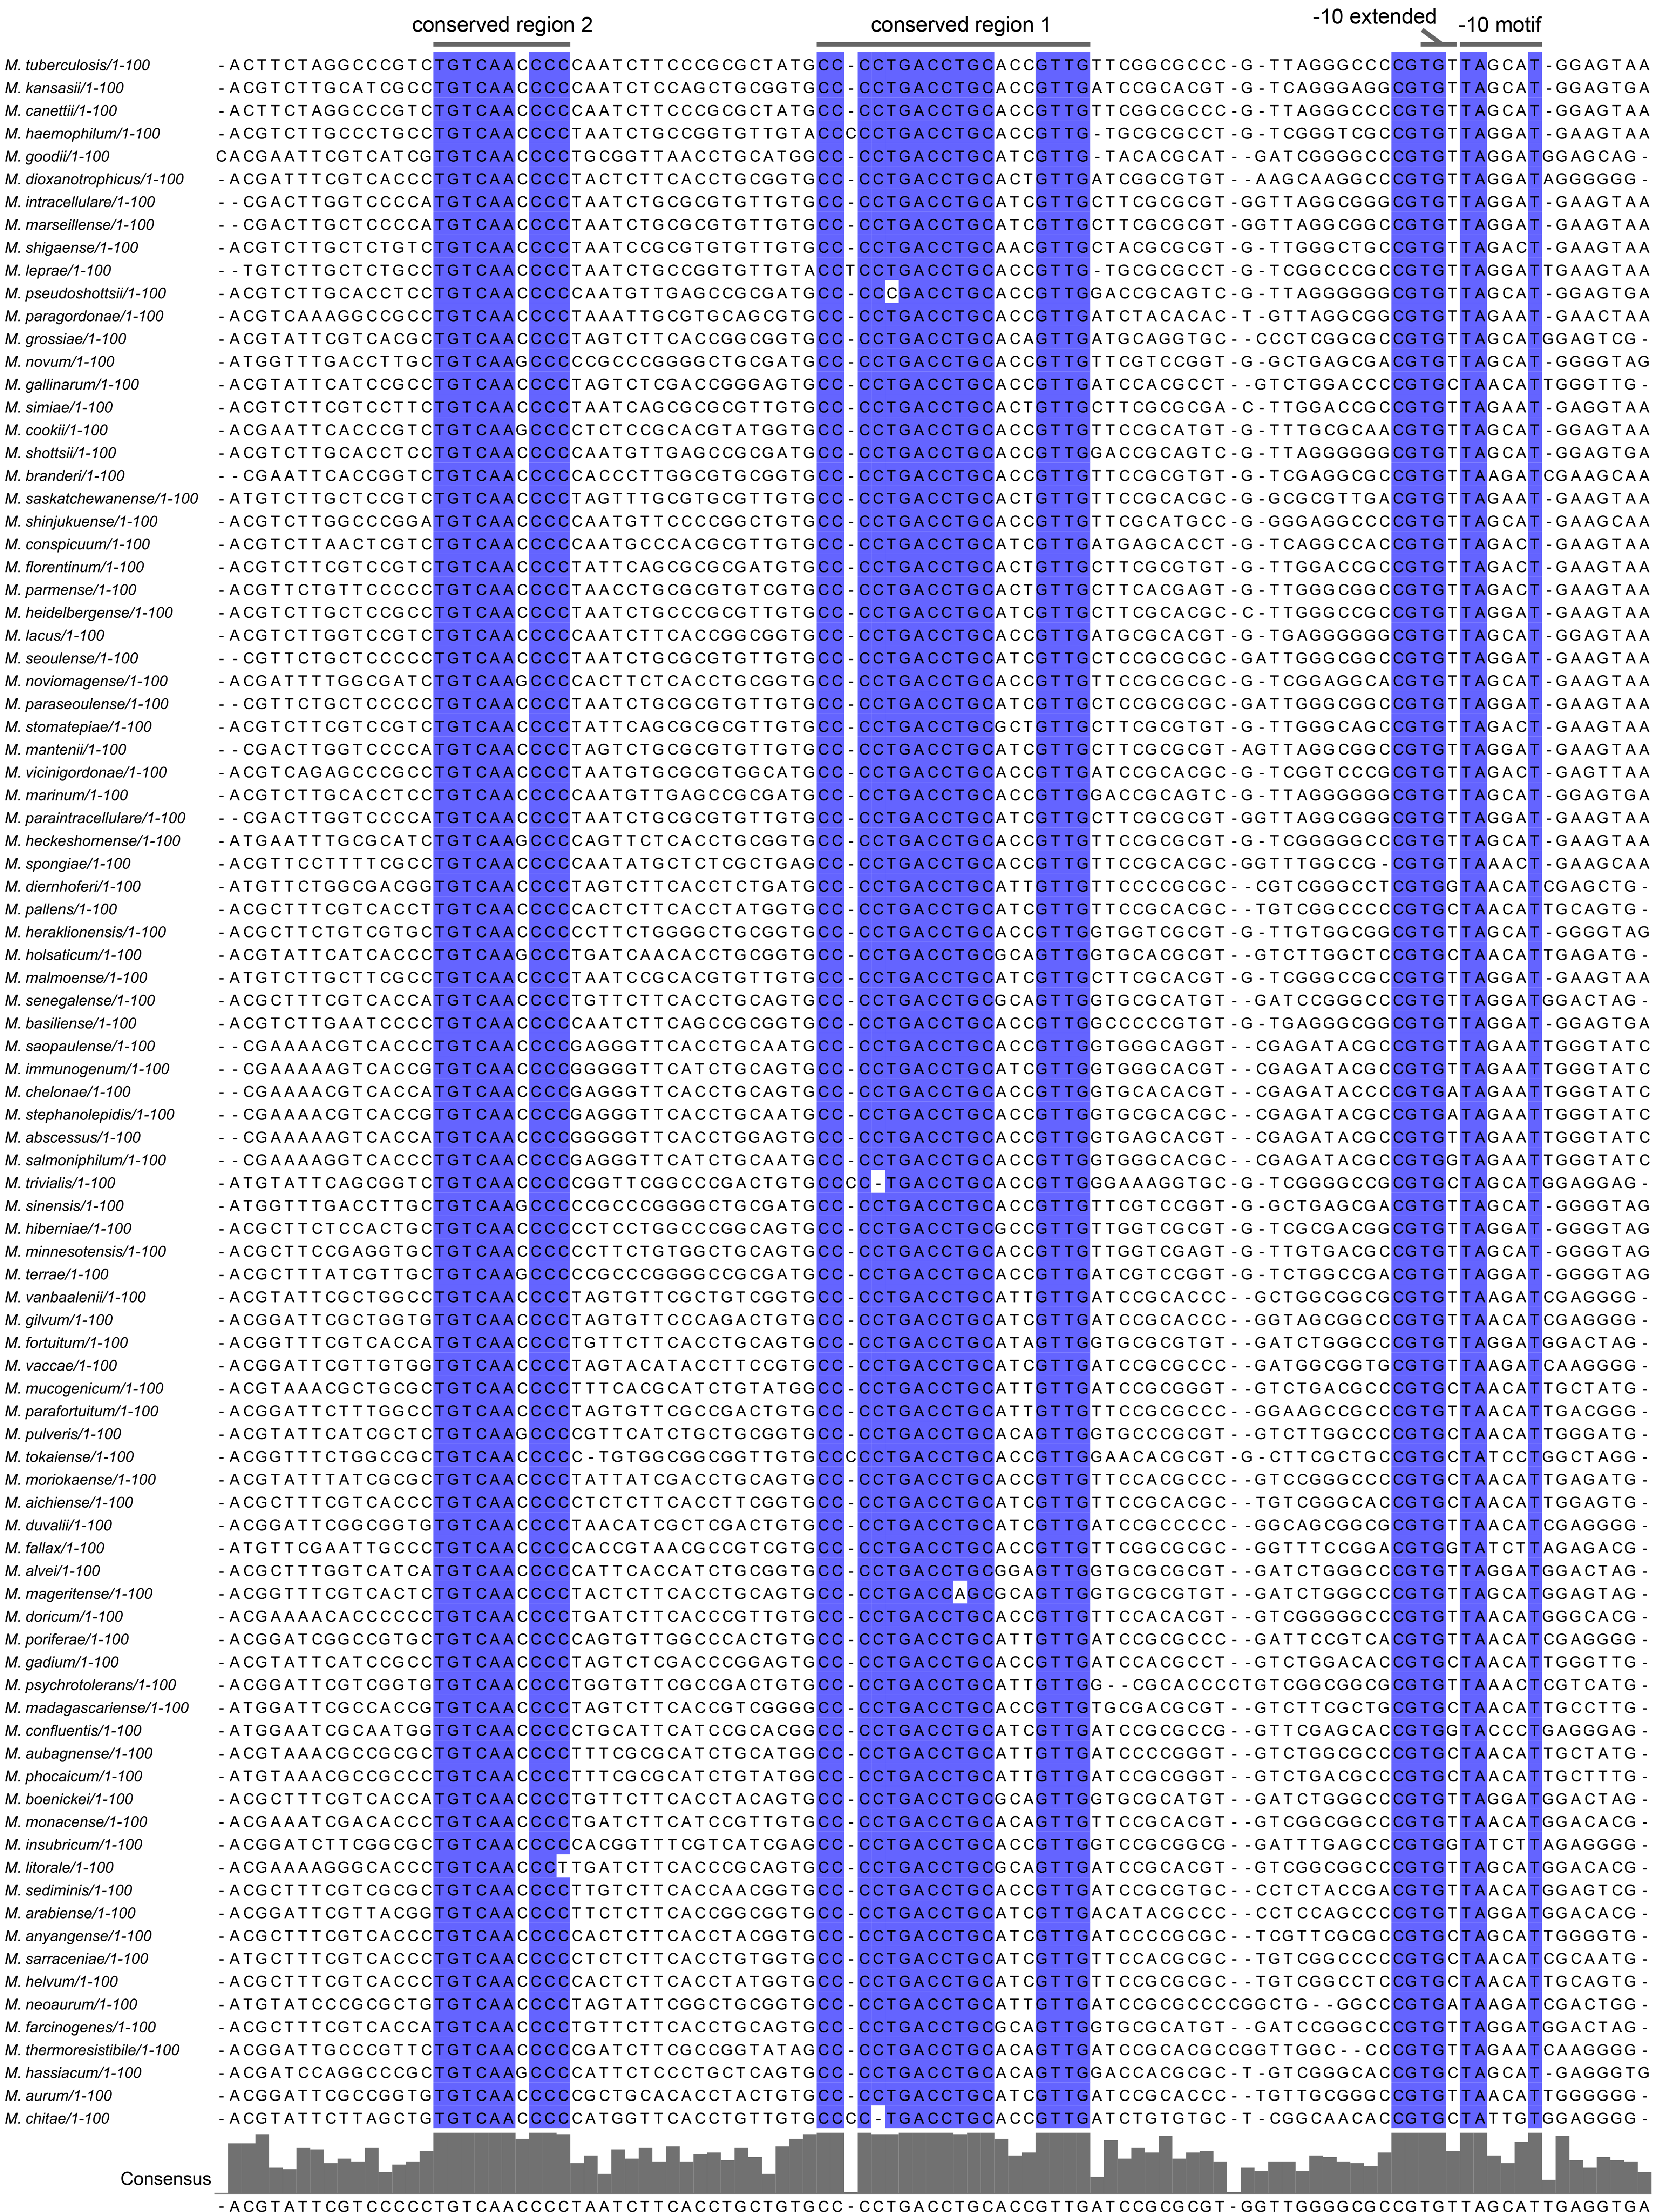

Supplement: supp [file elife-73347-supp-v1.zip › elife_poa_e73347_Figure_7_figure_supplement_1.tif]
